# Supplementary material
Source: PubMed Central journal article supplement (PMC3718309)
Supplement: NIHMS470450-supplement-Supplementary.pdf [file NIHMS470450-supplement-Supplementary.pdf]

## **Appendix**

### **Neurologic Outcome Research Group of the Duke Heart Center**

**Director:** Joseph P. Mathew, M.D.; **Co-Director:** James A. Blumenthal, Ph.D.

#### ***Anesthesiology:***

Hilary P. Grocott, M.D., Frederick W. Lombard, M.D., G. Burkhard Mackensen, M.D., Ph.D., Joseph P. Mathew, M.D., David McDonagh, M.D., Terri Monk, M.D., Mark F. Newman, M.D., Barbara Phillips-Bute, Ph.D., Mihai V. Podgoreanu, M.D., Andrew D. Shaw, M.D., Mark Stafford-Smith, M.D., Madhav Swaminathan, M.D., David Warner, M.D., William D. White, M.P.H., Narai Balajonda, M.D., Lauren Baker, B.S., Bonita Funk, R. N., Roger L. Hall, A.A.S., Kimberly Martin B.S., Felisa W. Anderson, Gladwell Mbochi, A.A.S., Charles R. Peters, M.A., Prometheus T. Solon, M.D., Peter Waweru

#### ***Behavioral Medicine:***

Michael A. Babyak, Ph.D., James A. Blumenthal, Ph.D

#### ***Cardiology:***

Daniel B. Mark, M.D., M.P.H., Michael H. Sketch, Jr., M.D.

#### ***Neurology:***

Ellen R. Bennett, Ph.D., Carmelo Graffagnino, M.D., Daniel T. Laskowitz, M.D., Warren J. Strittmatter, M.D., Kathleen A. Welsh-Bohmer, Ph.D.

***Perfusion Services:***

Kevin Collins, B.S., CCP, Greg Smigla, B.S., C.C.P., Ian Shearer, B.S., C.C.P

***Surgery:***

Thomas A. D'Amico, M.D., R. Duane Davis, M.D., Jeffrey G. Gaca, M.D., Donald D.

Glower, M.D., R. David Harpole, M.D, G. Chad Hughes, M.D., James Jagers, M.D.,

Shu Lin, M.D., Andrew Lodge, M.D., James E. Lowe, M.D., Carmelo Milano, M.D.,

Mark Onaitis, M.D., Peter K. Smith, M.D.
